# Supplementary material for: New Cytotoxic Secondary Metabolites from Marine Bryozoan Cryptosula pallasiana
Source: PubMed Central journal article supplement (PMC5408266; doi:10.3390/md15040120), 2017-04-13
Supplement: marinedrugs-15-00120-s001.pdf [file marinedrugs-15-00120-s001.pdf]

# New Cytotoxic Secondary Metabolites from Marine Bryozoan *Cryptosula pallasiana*

Xiang-Rong Tian <sup>1,2†</sup>, Yan-Qing Gao <sup>1†</sup>, Xiao-Lin Tian <sup>1</sup>, Hai-Feng Tang <sup>2,\*</sup>, Yu-Shan Li <sup>3</sup>, Hou-Wen Lin <sup>4</sup> and Zhi-Qing Ma <sup>1,\*</sup>

\* Author to whom correspondence should be addressed; tanghaifeng71@163.com; zhiqingma@nwsuaf.edu.cn (Z.-Q. M.); Tel./Fax.: +86-29-84774748; Tel.: +86-29-87092122; Fax.: +86-29-87093344

† These authors contributed equally to this work.

## Supplementary Information

**S1.** HR-ESI-MS (positive) spectrum of compound **1**

**S2.** ESI-MS (positive) spectrum of compound **1**

**S3.** <sup>1</sup>H-NMR (CDCl<sub>3</sub>, 500 MHz) spectrum of compound **1**

**S4.** <sup>13</sup>C-NMR (CDCl<sub>3</sub>, 125 MHz) spectrum of compound **1**

**S5.** DEPT135 spectrum of compound **1**

**S6.** <sup>1</sup>H-<sup>1</sup>H COSY spectrum of compound **1**

**S7.** HSQC spectrum of compound **1**

**S8.** HMBC spectrum of compound **1**

**S9.** NOESY spectrum of compound **1**

**S10.** HR-ESI-MS (positive) spectrum of compound **6**

**S11.** EI-MS spectrum of methyl tetradecanoate obtained from methanolysis of ceramide **6**

**S12.** <sup>1</sup>H-NMR (CDCl<sub>3</sub>, 500 MHz) spectrum of compound **6**

**S13.** <sup>13</sup>C-NMR (CDCl<sub>3</sub>, 125 MHz) spectrum of compound **6**

**S14.** HR-ESI-MS (positive) spectrum of compound **7**

**S15.** EI-MS spectrum of (*R*)-methyl 2-hydroxytetradecanoate obtained from methanolysis of ceramide

**7**

**S16.** <sup>1</sup>H-NMR (CDCl<sub>3</sub>, 500 MHz) spectrum of compound **7**

**S17.**  $^{13}\text{C}$ -NMR ( $\text{CDCl}_3$ , 125 MHz) spectrum of compound **7**

**S18.**  $^1\text{H}$ -NMR ( $\text{CDCl}_3$ , 500 MHz) data of compound **2**

**S19.**  $^1\text{H}$ -NMR ( $\text{CDCl}_3$ , 500 MHz) data of compound **3**

**S20.**  $^1\text{H}$ -NMR ( $\text{CDCl}_3$ , 500 MHz) data of compound **4**

**S21.**  $^{13}\text{C}$ -NMR ( $\text{CDCl}_3$ , 125 MHz) data of compounds **2–4**

**S22.**  $^1\text{H}$ -NMR ( $\text{CD}_3\text{OD}$ , 500 MHz) and  $^{13}\text{C}$  NMR ( $\text{CD}_3\text{OD}$ , 125 MHz) data of compound **5**

**S23.**  $^1\text{H}$ -NMR ( $\text{CDCl}_3$ , 500MHz),  $^{13}\text{C}$ -NMR ( $\text{CDCl}_3$ , 125 MHz) and ESI-MS data of compound **8**

**S24.**  $^1\text{H}$ -NMR ( $\text{CDCl}_3$ , 500MHz),  $^{13}\text{C}$ -NMR ( $\text{CDCl}_3$ , 125 MHz) and ESI-MS data of compound **9**

S1. HR-ESI-MS (positive) spectrum of compound 1

Elemental Composition Report

Multiple Mass Analysis: 2 mass(es) processed

Tolerance = 30.0 PPM / DBE: min = -1.5, max = 50.0

Selected filters: None

Monoisotopic Mass, Even Electron Ions

16 formula(e) evaluated with 2 results within limits (up to 50 closest results for each mass)

Elements Used:

C: 5-34 H: 10-55 O: 1-2 Na: 1-1

SIPI

XR-73 M.W=414

Q101845H 44 (1.520) AM (Cen,6, 80.00, Ar,5000.0,463.00,1.00); Sm (SG, 2x3.00); Cm (25:46)

26-Mar-2011, 15:53:57

0.00000000

TOF MS ES+

1.45e4

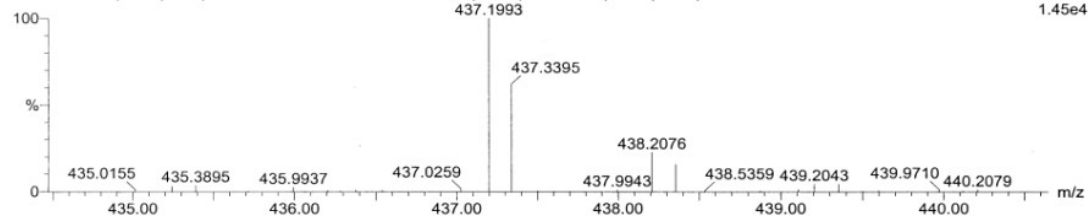

Minimum: 45.00  
Maximum: 100.00

| Mass     | RA     | Calc. Mass | mDa  | PPM  | DBE  | i-FIT | Formula       |
|----------|--------|------------|------|------|------|-------|---------------|
| 437.1993 | 100.00 | 437.1881   | 11.5 | 26.3 | 18.5 | 378.3 | C31 H26 O Na  |
| 437.3395 | 61.83  | 437.3396   | -0.2 | -0.5 | 5.5  | 79.2  | C28 H46 O2 Na |

S2. ESI-MS (positive) spectrum of compound 1

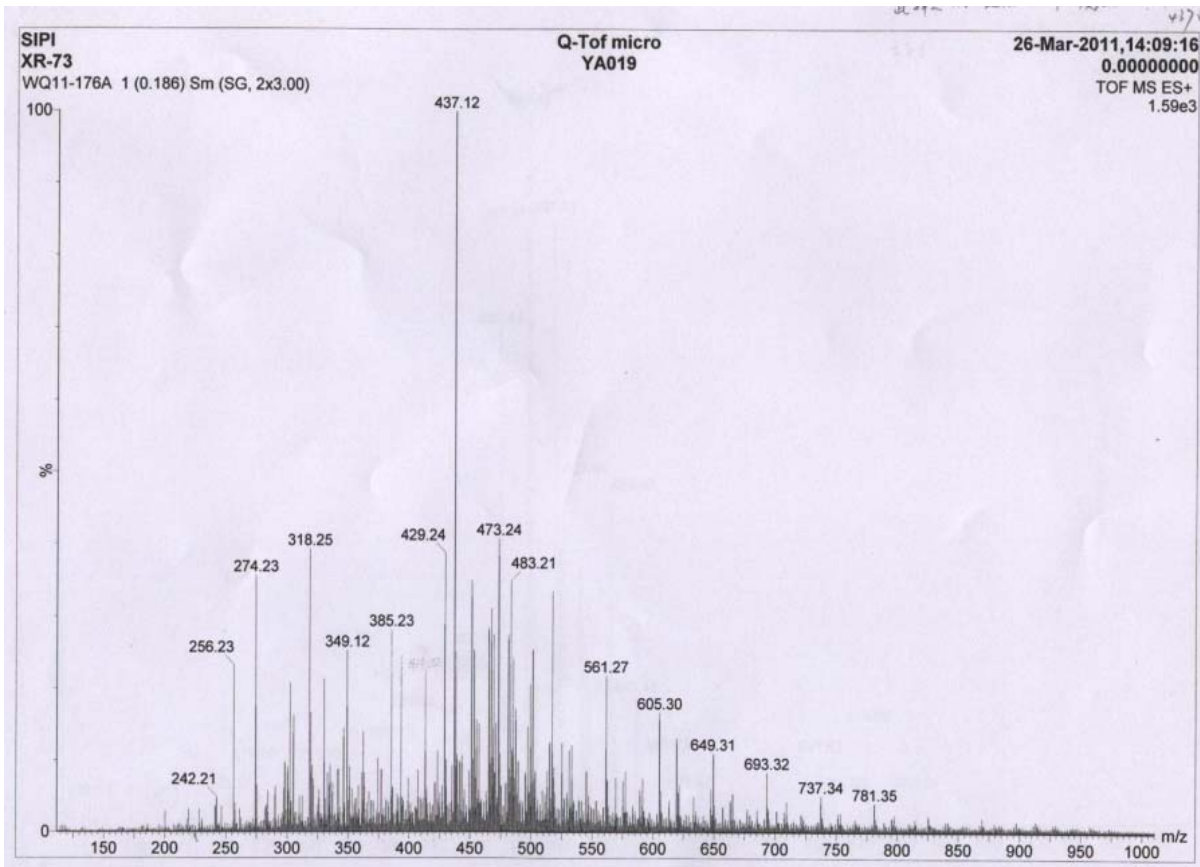

S3. <sup>1</sup>H-NMR (CDCl<sub>3</sub>, 500 MHz) spectrum of compound 1

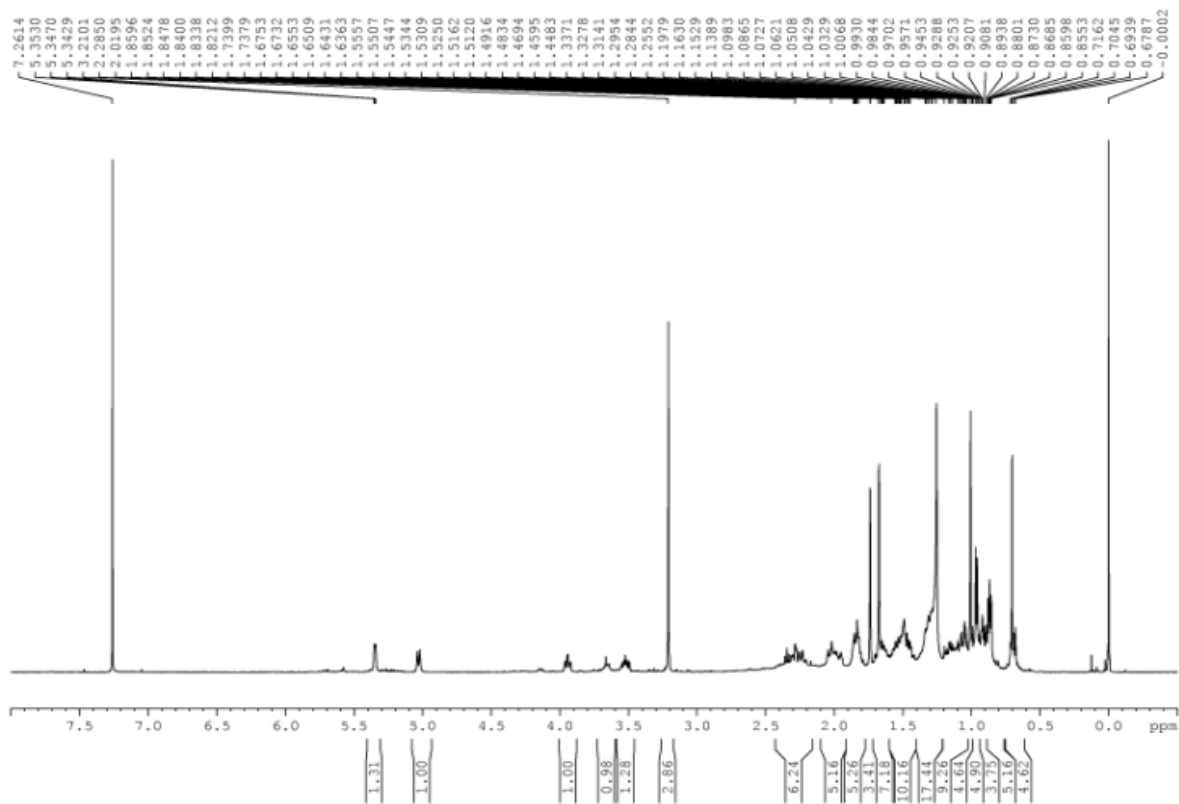

S4. <sup>13</sup>C-NMR (CDCl<sub>3</sub>, 125 MHz) spectrum of compound 1

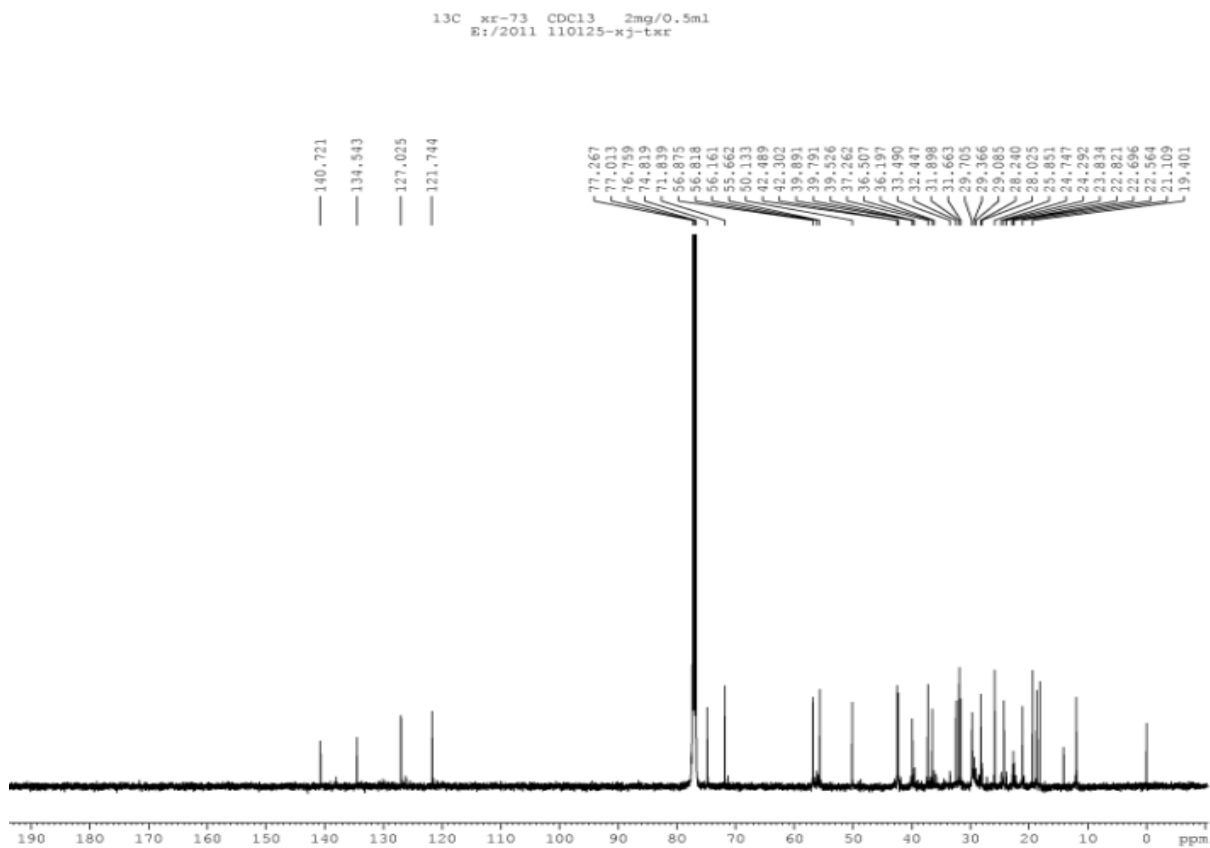

S5. DEPT135 spectrum of compound 1

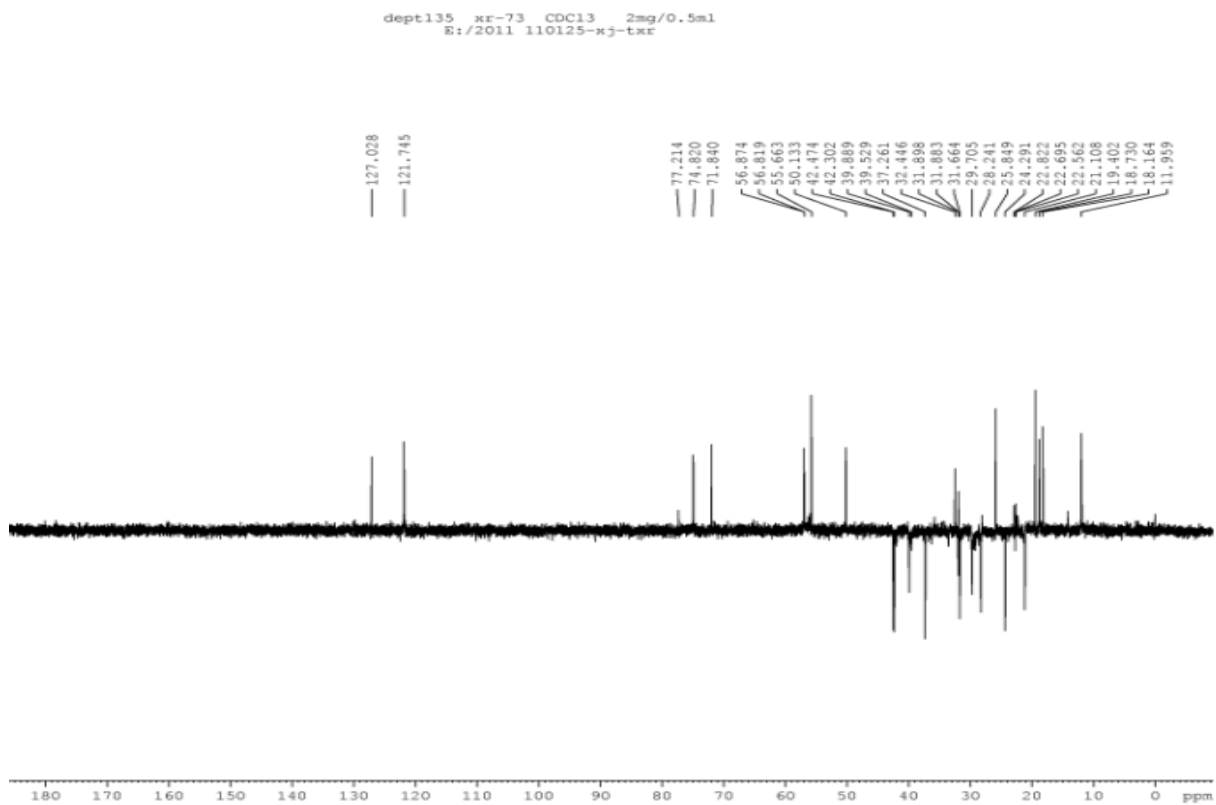

S6. <sup>1</sup>H-<sup>1</sup>H COSY spectrum of compound 1

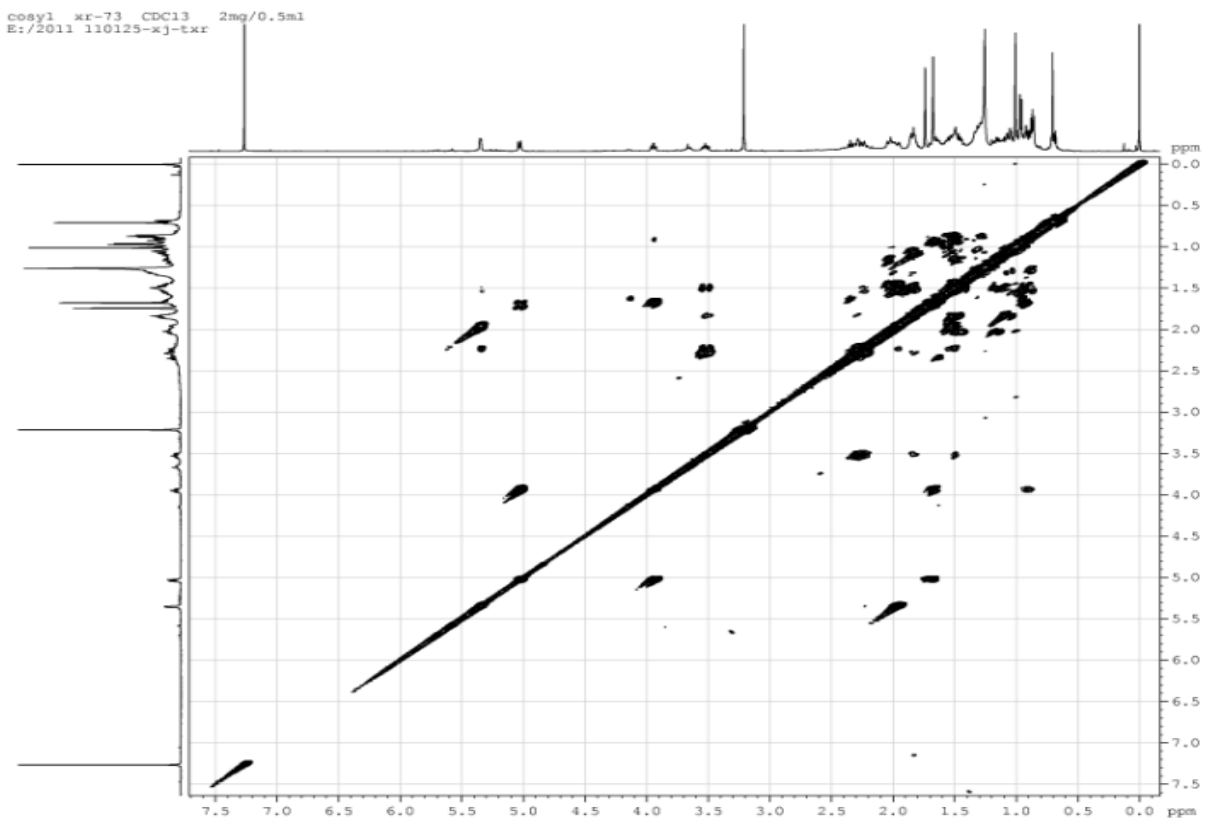

### S7. HSQC spectrum of compound 1

HSQC xr-73 CDC13 2mg/0.5ml  
E:/2011 110125-xj-txr

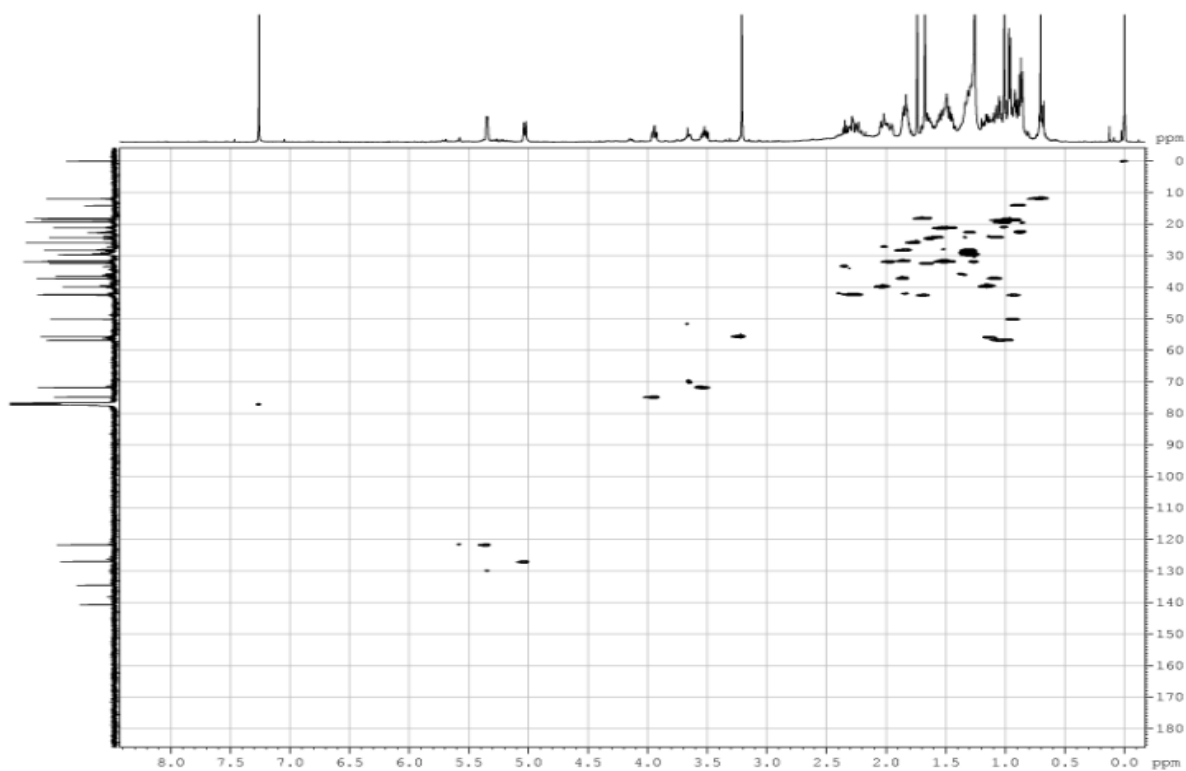

### S8. HMBC spectrum of compound 1

hmhc xr-73 CDC13 2mg/0.5ml  
E:/2011 110125-xj-txr

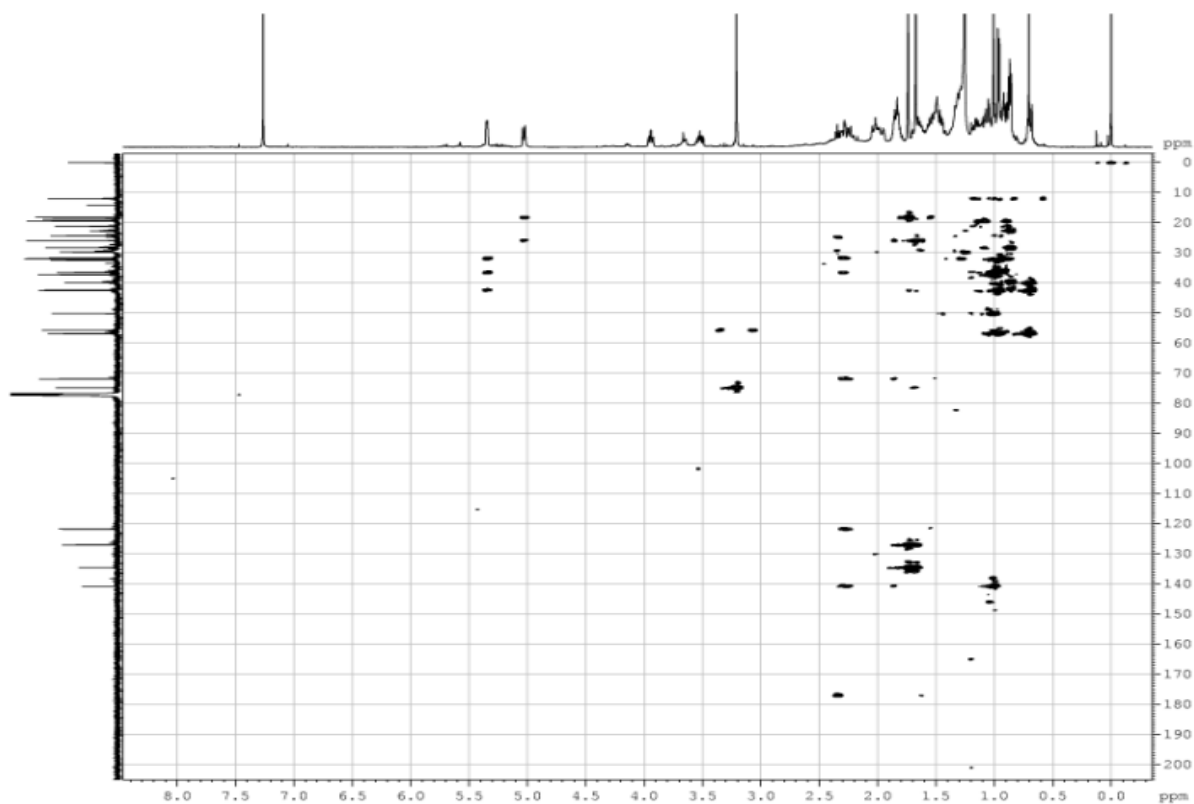

S9. NOESY spectrum of compound 1

noesy xr-73 CDCl3 2mg/0.5ml  
E:/2011 110125-xj-txr

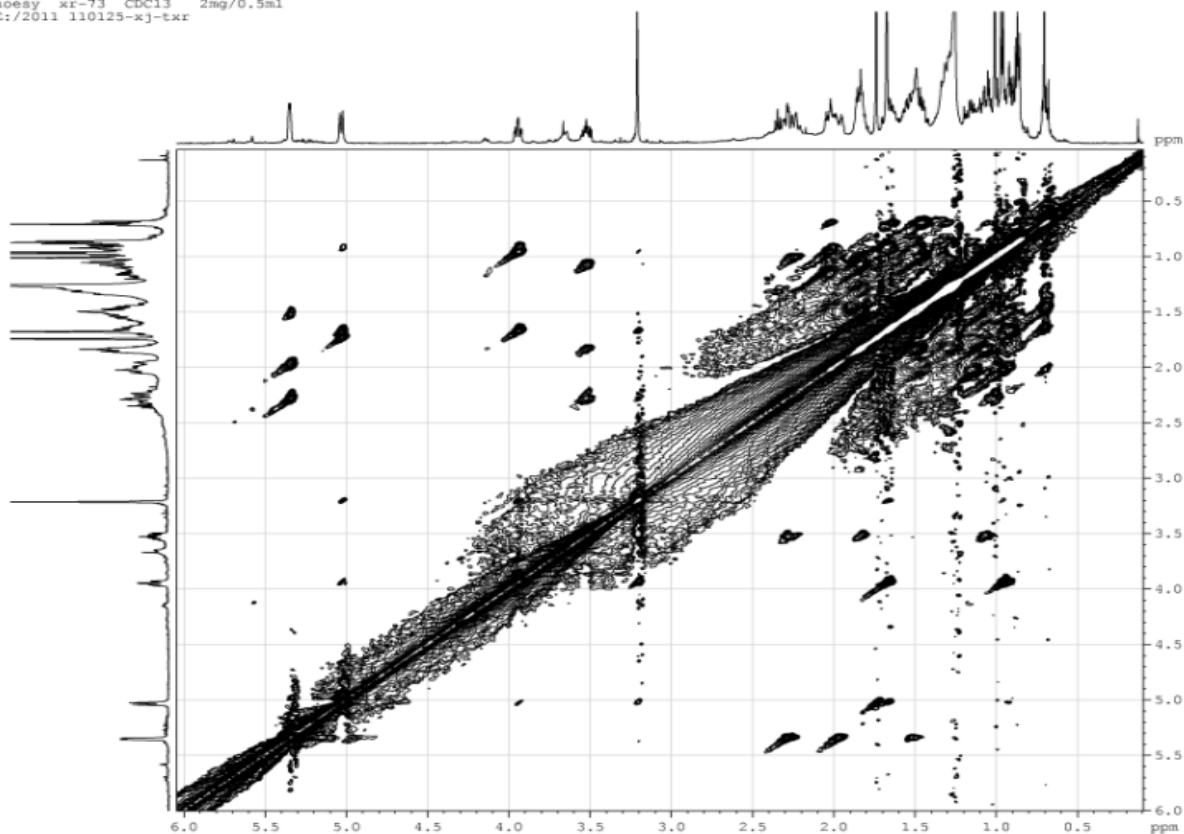

S10. HR-ESI-MS (positive) spectrum of compound 6

Elemental Composition Report

Page 1

Multiple Mass Analysis: 2 mass(es) processed

Tolerance = 10.0 PPM / DBE: min = -1.5, max = 50.0

Selected filters: None

Monoisotopic Mass, Even Electron Ions

16 formula(e) evaluated with 2 results within limits (up to 50 closest results for each mass)

Elements Used:

C:10-35 H:5-57 N:1-1 O:1-6 Na:1-1

SIP1

XR-70 M.W=507

Q101845H 44 (1.520) AM (Cen,6, 80.00, Ar,5000.0,463.00,1.00); Sm (SG, 2x3.00); Cm (25:46)

26-Mar-2011, 15:57:53

0.00000000

TOF MS ES+

5.45e4

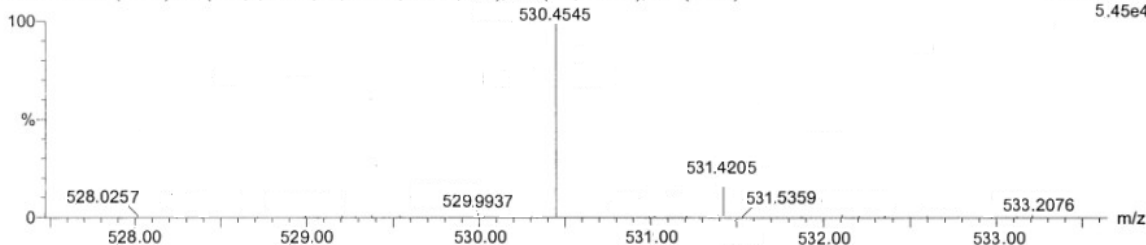

Minimum: 45.00  
Maximum: 100.00

| Mass     | RA     | Calc. Mass | mDa  | PPM | DBE  | i-FIT | Formula         |
|----------|--------|------------|------|-----|------|-------|-----------------|
| 530.4545 | 100.00 | 530.4549   | -0.4 | 6.5 | 18.3 | 38.5  | C32 H61 N O3 Na |

**S11.** EI-MS spectrum of methyl tetradecanoate obtained from methanolysis of ceramide 6

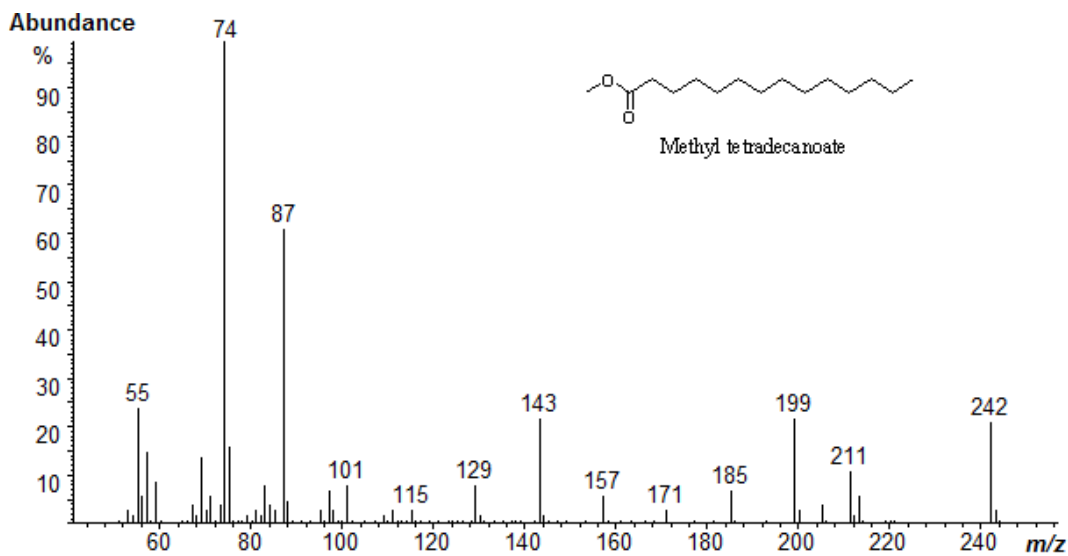

**S12.** <sup>1</sup>H-NMR (CDCl<sub>3</sub>, 500 MHz) spectrum of compound 6

<sup>1</sup>H\_xr-70 CDCl<sub>3</sub> 9.3mg/0.6ml  
E:/2011 110117-xj-txr

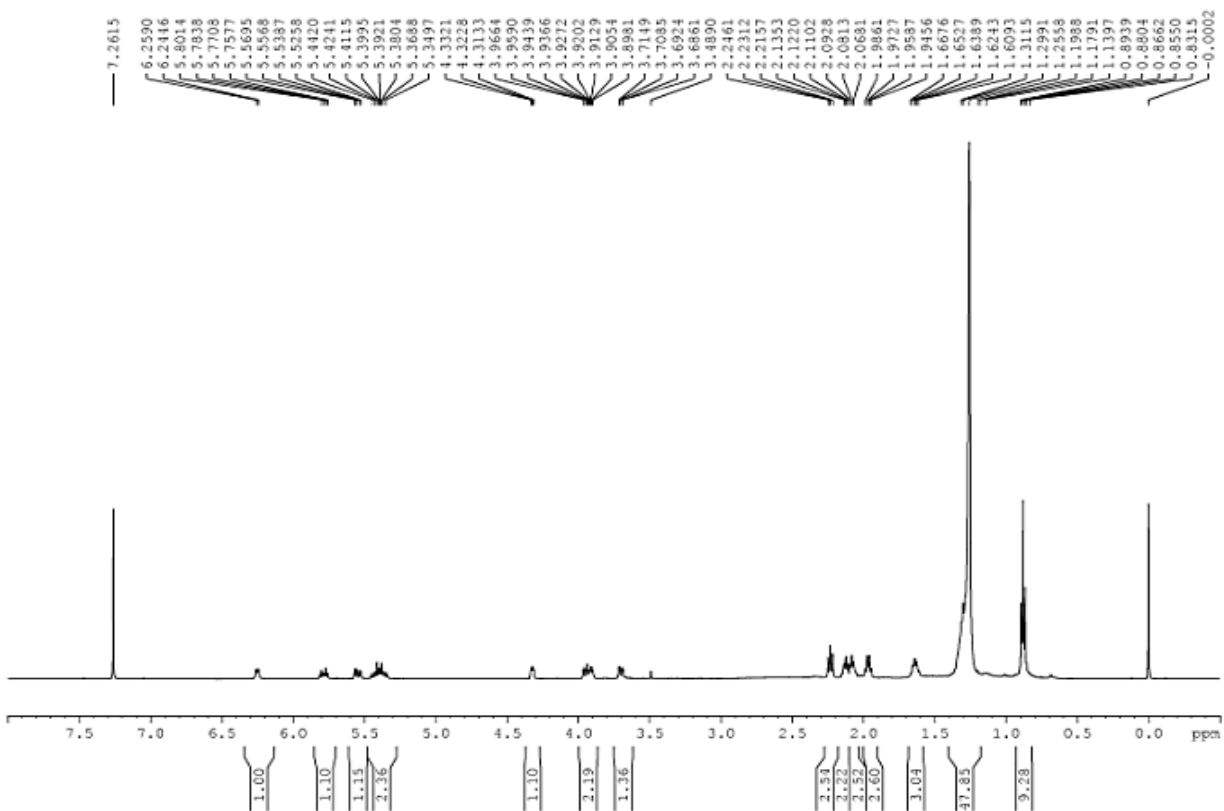



S13. <sup>13</sup>C-NMR (CDCl<sub>3</sub>, 125 MHz) spectrum of compound 6

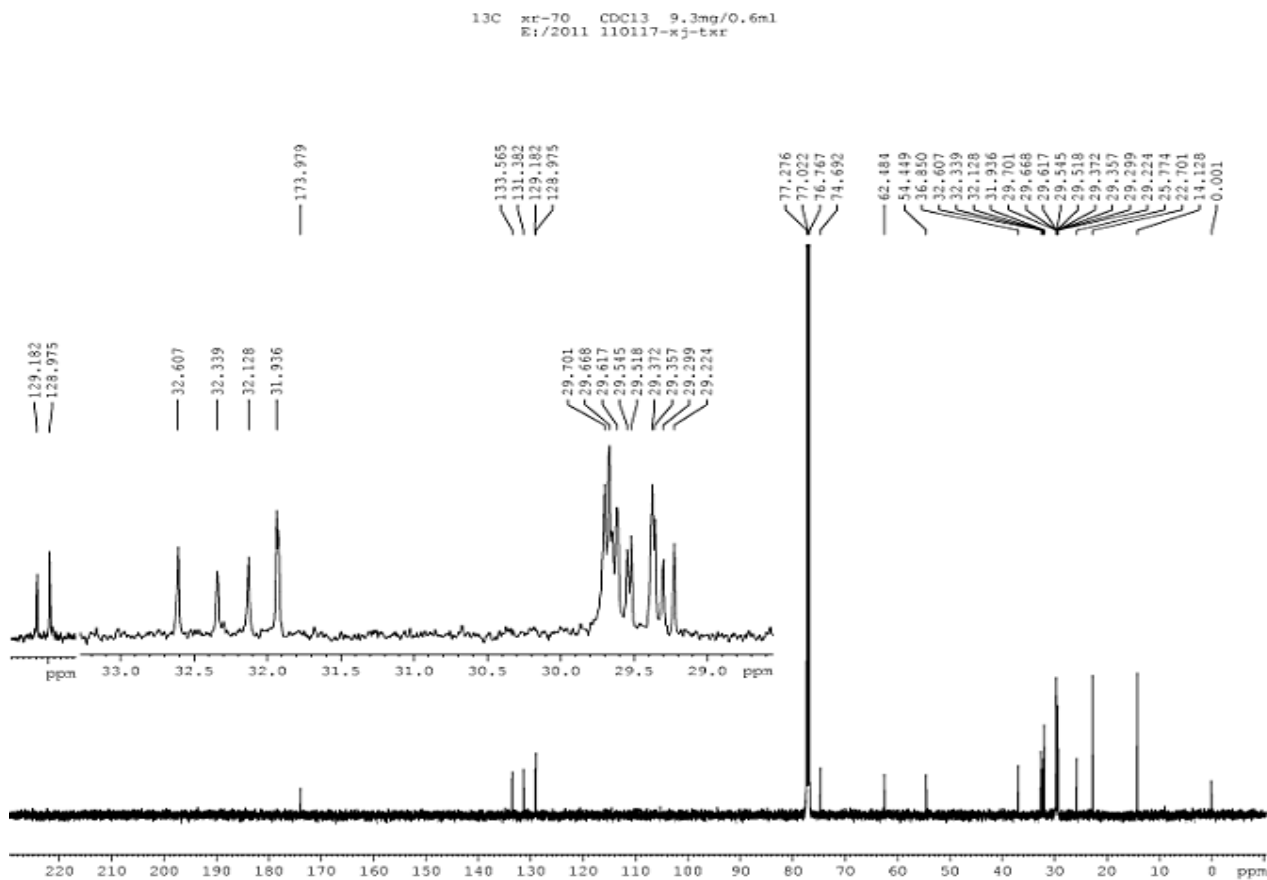

S14. HR-ESI-MS (positive) spectrum of compound 7

Elemental Composition Report

Multiple Mass Analysis: 2 mass(es) processed

Tolerance = 1 0.0 PPM / DBE: min = -1.5, max = 50.0  
Selected filters: None

Monoisotopic Mass, Even Electron Ions

16 formula(e) evaluated with 2 results within limits (up to 50 closest results for each mass)

Elements Used:

C:10-35 H:5-57 N:1-1 O:1-6 Na:1-1

SIPI

XR-71 M.W= 523

Q101845H 44 (1.520) AM (Cen,6, 80.00, Ar,5000.0,463.00,1.00); Sm (SG, 2x3.00); Cm (25:46)

Q-ToF micro

YA019

26-Mar-2011,16:25:53

0.00000000

TOF MS ES+

6.23e4

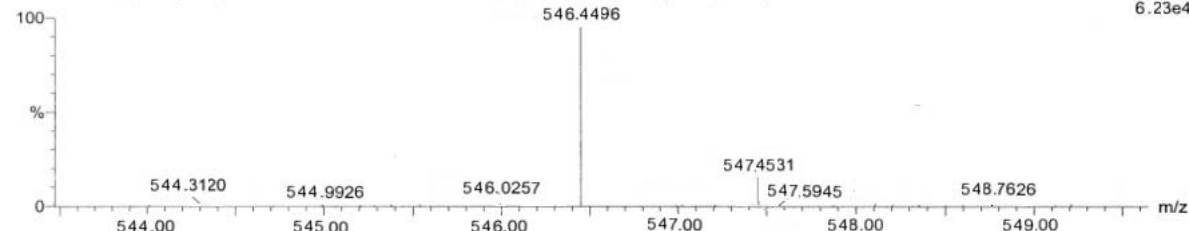

Minimum: 45.00  
Maximum: 100.00

| Mass     | RA     | Calc. Mass | mDa  | PPM | DBE  | i-FIT | Formula         |
|----------|--------|------------|------|-----|------|-------|-----------------|
| 546.4496 | 100.00 | 546.4498   | -0.2 | 4.5 | 16.8 | 30.5  | C32 H61 N O4 Na |

**S15.** EI-MS spectrum of (R)-Methyl 2-hydroxytetradecanoate obtained from methanolysis of ceramide

7

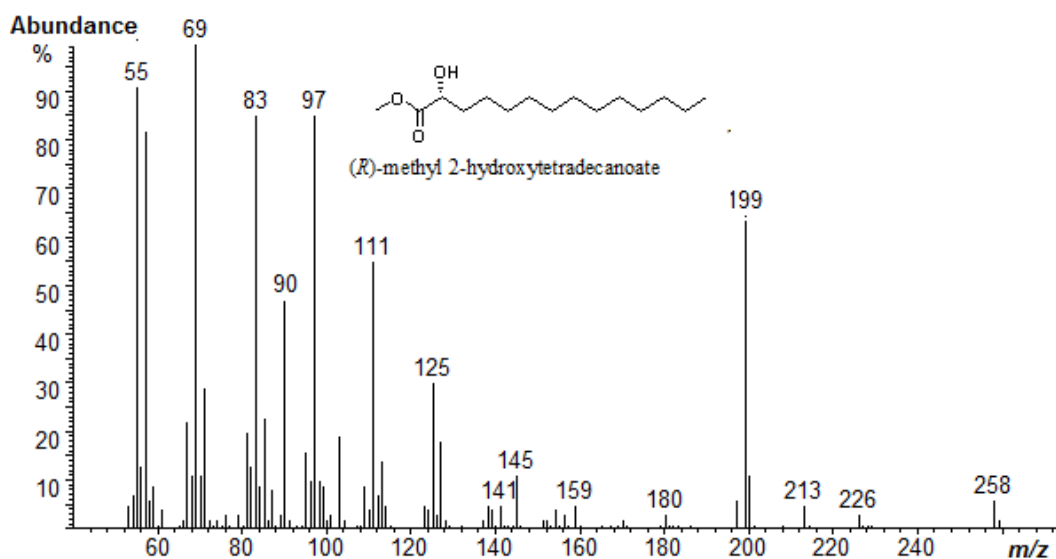**S16.**  $^1\text{H-NMR}$  ( $\text{CDCl}_3$ , 500 MHz) spectrum of compound 7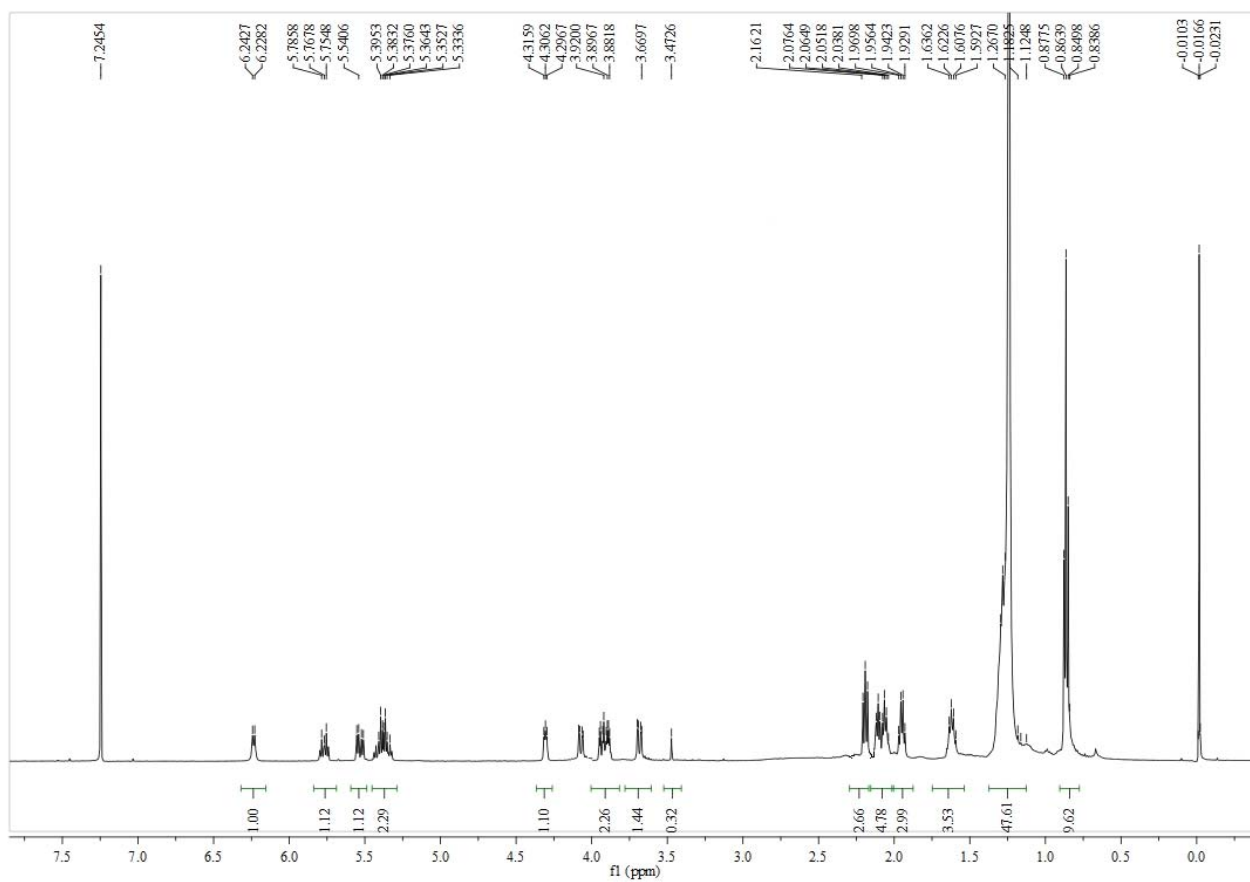

**S17.**  $^{13}\text{C}$ -NMR ( $\text{CDCl}_3$ , 125 MHz) spectrum of compound **7**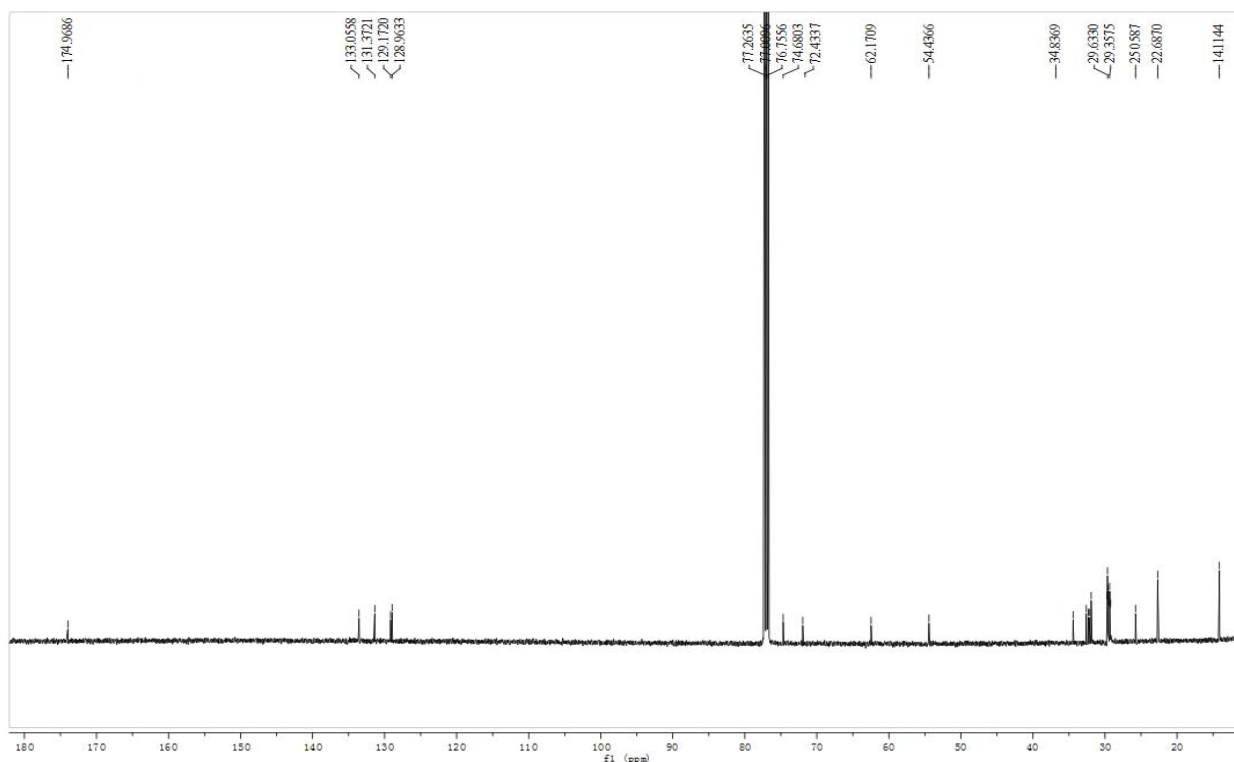**S18.**  $^1\text{H}$ -NMR ( $\text{CDCl}_3$ , 500MHz) data of compound **2**

$^1\text{H}$ -NMR (500MHz,  $\text{CDCl}_3$ )  $\delta$ : 5.35 (1H, *m*, H-6), 3.52 (1H, *m*, H-3), 1.00 (3H, *s*, H<sub>3</sub>-19), 0.91 (3H, *d*,  $J = 6.5$  Hz, H<sub>3</sub>-21), 0.87 (3H, *d*,  $J = 6.5$  Hz, H<sub>3</sub>-26), 0.86 (3H, *d*,  $J = 6.5$  Hz, H<sub>3</sub>-27), 0.68 (3H, *s*, H<sub>3</sub>-18).

**S19.**  $^1\text{H}$ -NMR ( $\text{CDCl}_3$ , 500MHz) data of compound **3**

$^1\text{H}$  NMR (500 MHz,  $\text{CDCl}_3$ )  $\delta$ : 5.35 (1H, *t*,  $J = 2.6$  Hz, H-7), 5.28 (1H, *dd*,  $J = 15.3, 6.7$  Hz, H-23), 5.20 (1H, *dd*,  $J = 15.5, 7.0$  Hz, H-22), 4.08 (1H, *m*, H-3), 3.63 (1H, *d*,  $J = 5.1$  Hz, H-6), 1.18 (3H, *s*, H<sub>3</sub>-19), 1.00 (3H, *d*,  $J = 6.6$  Hz, H<sub>3</sub>-21), 0.86 (6H, *d*,  $J = 6.6$  Hz, H<sub>3</sub>-26, H<sub>3</sub>-27), 0.69 (3H, *s*, H-18).

**S20.**  $^1\text{H}$ -NMR ( $\text{CDCl}_3$ , 500MHz) data of compound **4**

$^1\text{H}$ -NMR (500 MHz,  $\text{CDCl}_3$ )  $\delta$ : 5.35 (1H, *m*, H-7), 5.21 (1H, *dd*,  $J = 15.2, 7.5$  Hz, H-23), 5.16 (1H, *dd*,  $J = 15.1, 7.4$  Hz, H-22), 4.07 (1H, *m*, H-3), 3.63 (1H, *d*,  $J = 5.1$  Hz, H-6), 1.09 (3H, *s*, H<sub>3</sub>-19), 1.02 (3H, *d*,  $J = 6.7$  Hz, H<sub>3</sub>-21), 0.92 (3H, *d*,  $J = 6.8$  Hz, H<sub>3</sub>-28), 0.84 (3H, *d*,  $J = 6.4$  Hz, H<sub>3</sub>-26), 0.82 (3H, *d*,  $J = 6.5$  Hz, H<sub>3</sub>-27), 0.60 (3H, *s*, H<sub>3</sub>-18).

**S21.**  $^{13}\text{C}$ -NMR ( $\text{CDCl}_3$ , 125 MHz) data of compounds **2 – 4** †

| NO. | 2                  | 3                  | 4                  |
|-----|--------------------|--------------------|--------------------|
|     | $\delta_C$ (mult.) | $\delta_C$ (mult.) | $\delta_C$ (mult.) |
| 1   | 37.3 <i>t</i>      | 33.0 <i>t</i>      | 33.0 <i>t</i>      |
| 2   | 31.7 <i>t</i>      | 30.8 <i>t</i>      | 30.9 <i>t</i>      |
| 3   | 71.8 <i>d</i>      | 67.8 <i>d</i>      | 67.8 <i>d</i>      |
| 4   | 42.3 <i>t</i>      | 39.5 <i>t</i>      | 39.2 <i>t</i>      |
| 5   | 140.8 <i>s</i>     | 76.1 <i>s</i>      | 76.1 <i>s</i>      |
| 6   | 121.7 <i>d</i>     | 73.7 <i>d</i>      | 73.7 <i>d</i>      |
| 7   | 31.9 <i>t</i>      | 117.5 <i>d</i>     | 117.5 <i>d</i>     |
| 8   | 31.9 <i>d</i>      | 144.1 <i>s</i>     | 144.0 <i>s</i>     |
| 9   | 50.1 <i>d</i>      | 43.5 <i>d</i>      | 43.5 <i>d</i>      |
| 10  | 36.5 <i>s</i>      | 37.1 <i>s</i>      | 37.2 <i>s</i>      |
| 11  | 21.1 <i>t</i>      | 22.1 <i>t</i>      | 22.1 <i>t</i>      |
| 12  | 39.8 <i>t</i>      | 39.8 <i>t</i>      | 39.5 <i>t</i>      |
| 13  | 42.3 <i>s</i>      | 43.8 <i>s</i>      | 43.8 <i>s</i>      |
| 14  | 56.8 <i>d</i>      | 54.7 <i>d</i>      | 54.8 <i>d</i>      |
| 15  | 24.3 <i>t</i>      | 22.9 <i>t</i>      | 22.9 <i>t</i>      |
| 16  | 28.2 <i>t</i>      | 28.6 <i>t</i>      | 28.2 <i>t</i>      |
| 17  | 56.2 <i>d</i>      | 56.0 <i>d</i>      | 55.9 <i>d</i>      |
| 18  | 11.9 <i>q</i>      | 12.3 <i>q</i>      | 12.3 <i>q</i>      |
| 19  | 19.4 <i>q</i>      | 18.8 <i>q</i>      | 18.8 <i>q</i>      |
| 20  | 35.8 <i>d</i>      | 40.2 <i>d</i>      | 40.5 <i>d</i>      |
| 21  | 18.7 <i>q</i>      | 20.8 <i>q</i>      | 21.1 <i>q</i>      |
| 22  | 36.2 <i>t</i>      | 138.1 <i>d</i>     | 135.6 <i>d</i>     |
| 23  | 23.8 <i>t</i>      | 126.3 <i>d</i>     | 132.3 <i>d</i>     |
| 24  | 39.5 <i>t</i>      | 42.0 <i>t</i>      | 43.1 <i>d</i>      |
| 25  | 28.3 <i>d</i>      | 28.5 <i>d</i>      | 33.2 <i>d</i>      |
| 26  | 22.8 <i>q</i>      | 22.2 <i>q</i>      | 19.7 <i>q</i>      |
| 27  | 22.6 <i>q</i>      | 22.3 <i>q</i>      | 20.2 <i>q</i>      |
| 28  |                    |                    | 18.0 <i>q</i>      |

† Assignments aided by DEPT experiments and literatures.

**S22.**  $^1\text{H-NMR}$  ( $\text{CD}_3\text{OD}$ , 500 MHz) and  $^{13}\text{C-NMR}$  ( $\text{CD}_3\text{OD}$ , 125 MHz) data of compound **5**

$^1\text{H-NMR}$  ( $\text{CD}_3\text{OD}$ , 500 MHz)  $\delta$ : 5.74 (1H, *s*, H-7), 4.21 (1H, *tt*,  $J = 7.0, 3.7$  Hz, H-3), 2.41 (1H, *dt*,  $J = 13.9, 2.5$  Hz, H-4b), 1.98 (1H, *dt*,  $J = 14.4, 2.5$  Hz, H-2b), 1.75 (3H, *s*, H<sub>3</sub>-11), 1.72 (1H, *d*,  $J =$

4.1 Hz, H-4a), 1.51 (1H, *dd*,  $J = 14.4, 5.0$  Hz, H-2a), 1.46 (3H, *s*, H<sub>3</sub>-10), 1.26 (3H, *s*, H<sub>3</sub>-9); <sup>13</sup>C-NMR (CD<sub>3</sub>OD, 125 MHz)  $\delta$ : 185.7 (*s*, C-6), 174.4 (*s*, C-8), 113.3 (*d*, C-7), 89.0 (*s*, C-5), 67.2 (*d*, C-3), 48.0 (*t*, C-2), 46.4 (*t*, C-4), 37.2 (*s*, C-1), 31.0 (*q*, C-9), 27.4 (*q*, C-11), 27.0 (*q*, C-10).

**S23.** <sup>1</sup>H-NMR (CDCl<sub>3</sub>, 500MHz), <sup>13</sup>C-NMR (CDCl<sub>3</sub>, 125 MHz) and ESI-MS data of compound **8**

<sup>1</sup>H-NMR (500 MHz, CDCl<sub>3</sub>)  $\delta$ : 6.25 (1H, *d*,  $J = 7.2$  Hz, NH), 5.78 (1H, *dt*,  $J = 15.0, 6.6$  Hz, H-5), 5.53 (1H, *dd*,  $J = 15.3, 6.5$  Hz, H-4), 4.32 (1H, *br t*,  $J = 4.4$  Hz, H-3), 3.95 (1H, *dd*,  $J = 11.2, 3.7$  Hz, H-2), 3.90 (1H, *m*, H-1b), 3.70 (1H, *dd*,  $J = 11.2, 3.2$  Hz, H-1a), 2.23 (2H, *t*,  $J = 7.5$  Hz, H-2'), 2.05 (4H, *q*,  $J = 7.1$ , H-6), 1.63 (2H, *m*, H-3'), 1.26-1.37 (42H, *m*, H-7 – H-17, H-4' – H-13'), 0.88 (6H, *t*,  $J = 7.0$  Hz, H-18, H-14'); <sup>13</sup>C-NMR (125 MHz, CDCl<sub>3</sub>)  $\delta$ : 174.0 (C-1'), 134.3 (C-5), 128.8 (C-4), 74.7 (C-3), 62.5 (C-1), 54.5 (C-2), 36.9 (C-2'), 32.3 (C-6), 31.9 (C-12', C-7, C-16), 29.1-29.7 (C-8 – C-15, C-4' – C-11'), 25.8 (C-3'), 22.7 (C-17, C-13'), 14.1 (C-18, C-14'); ESI-MS (+)  $m/z$ : 532 [M + Na]<sup>+</sup>, 437, 330, 302, 274, 264, 256, 219; ESI-MS (–)  $m/z$ : 554, [M + COOH]<sup>–</sup>, 544 [M + Cl]<sup>–</sup>, 508 [M – H]<sup>–</sup>, 447, 394, 339, 325, 311, 283, 265, 255, 227, 143, 126.

**S24.** <sup>1</sup>H-NMR (CDCl<sub>3</sub>, 500MHz), <sup>13</sup>C-NMR (CDCl<sub>3</sub>, 125 MHz) and ESI-MS data of compound **9**

<sup>1</sup>H-NMR (500 MHz, CDCl<sub>3</sub>)  $\delta$ : 6.25 (1H, *d*,  $J = 7.5$  Hz, NH), 5.77 (1H, *dt*,  $J = 15.2, 6.65$  Hz, H-5), 5.54 (1H, *dd*,  $J = 15.4, 6.4$  Hz, H-4), 5.42 (1H, *dt*,  $J = 15.2, 6.3$  Hz, H-9), 5.37 (1H, *dt*,  $J = 15.2, 6.4$  Hz, H-8), 4.32 (1H, *br s*, H-3), 3.94 (1H, *dd*,  $J = 11.3, 3.7$  Hz, H-2), 3.91 (1H, *m*, H-1b), 3.71 (1H, *dd*,  $J = 11.3, 3.5$  Hz, H-1a), 2.23 (2H, *t*,  $J = 7.5$  Hz, H-2'), 2.12 (2H, *m*, H-7), 2.07 (2H, *m*, H-10), 1.96 (2H, *q*-like,  $J = 6.7$  Hz, H-6), 1.64 (2H, *m*, H-3'), 1.26 (38H, *m*, H-11 – H-17, H-4' – H-15'), 0.88 (6H, *t*,  $J = 6.8$  Hz, H-18, H-16'); <sup>13</sup>C-NMR (125 MHz, CDCl<sub>3</sub>)  $\delta$ : 174.0 (C-1'), 133.6 (C-5), 131.4 (C-8), 129.2 (C-4), 129.0 (C-9), 74.7 (C-3), 62.5 (C-1), 54.5 (C-2), 36.9 (C-2'), 32.6 (C-10), 32.3 (C-6), 32.1 (C-7), 31.9 (C-14', C-16), 29.2-29.7 (C-11 – C-15, C-4' – C-13'), 25.8 (C-3'), 22.7 (C-17, C-15'), 14.1 (C-18, C-16'); ESI-MS (+)  $m/z$ : 558 [M + Na]<sup>+</sup>, 437, 330, 274, 262, 256; ESI-MS (–)  $m/z$ : 570 [M + Cl]<sup>–</sup>, 534 [M – H]<sup>–</sup>, 325, 311, 283, 255, 155, 113.
